# Supplementary material
Source: PubMed Central journal article supplement (PMC4174959)
Supplement: NIHMS617877-supplement-Supple_fig.pdf [file NIHMS617877-supplement-Supple_fig.pdf]

## SUPPLEMENTAL MATERIAL

### **FSTL1 Attenuates Apoptosis via DIP2A/Akt Pathway after MCAO in Rats**

Xiping Liang M.D.<sup>1, 3#</sup>, Qin Hu M.D., Ph.D.<sup>1#</sup>, Bo Li M.D., Ph.D.<sup>1</sup>, Devin M<sup>c</sup>Bride Ph.D.<sup>1</sup>, Hetao Bian M.D.<sup>1</sup>, Pierre Spagnoli B.S.<sup>1</sup>, Di Chen M.D., Ph.D.<sup>1</sup>, Jiping Tang M.D.<sup>1</sup>, John H Zhang M.D., Ph.D.<sup>1, 2\*</sup>

<sup>1</sup>Departments of Physiology and Pharmacology, Loma Linda University School of Medicine, Loma Linda, CA, USA; <sup>2</sup>Departments of Neurosurgery, Loma Linda University School of Medicine, Loma Linda, CA, USA; <sup>3</sup>Departments of neurology, Chongqing Medical University, Chongqing, China.

# These authors contributed equally to this work.

\*Corresponding author: John H. Zhang, M.D., Ph.D., Department of Neurosurgery and Department of Physiology and Pharmacology, Loma Linda University School of Medicine, 11041 Campus street, Risley Hall, Room 219, Loma Linda, CA, 92354, USA. E-mail: johnzhang3910@yahoo.com, Phone: 909-558-4723, Fax: 909-558-0119.

Supplemental Figures and Figure Legends

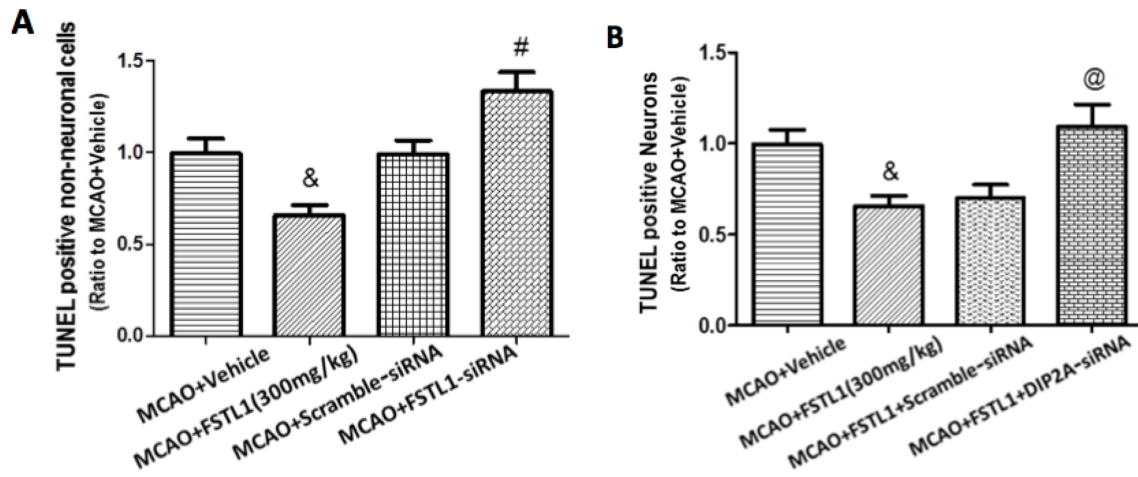

Supplement figure I. Statistical analysis of TUNEL positive non-neuronal cells in Figure 4A (A) and Figure 5A (B).  $n=6$  for each group. <sup>&</sup> $p<0.05$  vs. MCAO+Vehicle, <sup>#</sup> $p<0.05$  vs. MCAO+Scramble-siRNA, <sup>@</sup> $p<0.05$  vs. MCAO+FSTL1+Scramble-siRNA.
